# Supplementary material
Source: PubMed Central journal article supplement (PMC2712219)
Supplement: 90392.2008_1.pdf [file 90392.2008_1.pdf]

**Supplemental Table 1. Allelic effects of the two major QTLs on survival time in combined backcross groups.**

| Backcross population             |                                        | QTL Genotype             |             |              |                          |            |            |
|----------------------------------|----------------------------------------|--------------------------|-------------|--------------|--------------------------|------------|------------|
|                                  |                                        | <i>D1Mit303 (Shali1)</i> |             |              | <i>D4Mit308 (Shali2)</i> |            |            |
|                                  |                                        | BB                       | H           | SS           | BB                       | H          | SS         |
| Group B<br>(crosses 2, 4, 5, 7)  | Median (h)                             | 120                      | 126         | -            | 128                      | 114        | -          |
|                                  | (25 <sup>th</sup> , 75 <sup>th</sup> ) | (106, 137)               | (112, 137)  | -            | (113, 144)               | (105, 137) | -          |
|                                  | n                                      | 226                      | 228         | -            | 231                      | 221        | -          |
| Group B<br>males                 | Median (h)                             | 122                      | 129         | -            | 129                      | 119        | -          |
|                                  | (25 <sup>th</sup> , 75 <sup>th</sup> ) | (112, 137)               | (113, 144)  | -            | (114, 144)               | (106, 137) | -          |
|                                  | n                                      | 122                      | 118         | -            | 127                      | 112        | -          |
| Group B<br>females               | Median (h)                             | 114                      | 122         | -            | 127                      | 114        | -          |
|                                  | (25 <sup>th</sup> , 75 <sup>th</sup> ) | (103, 137)               | (107, 137)  | -            | (112.5, 145)             | (102, 129) | -          |
|                                  | n                                      | 104                      | 110         | -            | 104                      | 109        | -          |
| Group S<br>(crosses 3, 8, 9, 10) | Median (h)                             | -                        | 120         | 136          | -                        | 129        | 126        |
|                                  | (25 <sup>th</sup> , 75 <sup>th</sup> ) | -                        | (98, 148)   | (112, 161)   | -                        | (105, 161) | (100, 150) |
|                                  | n                                      | -                        | 241         | 238          | -                        | 246        | 222        |
| Group S<br>males                 | Median (h)                             | -                        | 123         | 136          | -                        | 136        | 126        |
|                                  | (25 <sup>th</sup> , 75 <sup>th</sup> ) | -                        | (99.5, 154) | (111, 172)   | -                        | (104, 171) | (102, 153) |
|                                  | n                                      | -                        | 124         | 130          | -                        | 136        | 111        |
| Group S<br>females               | Median (h)                             | -                        | 113         | 136          | -                        | 127        | 124        |
|                                  | (25 <sup>th</sup> , 75 <sup>th</sup> ) | -                        | (95, 139)   | (112, 161)   | -                        | (106, 154) | (98, 147)  |
|                                  | n                                      | -                        | 117         | 108          | -                        | 110        | 111        |
| B dam<br>(crosses 4, 5)          | Median (h)                             | 114                      | 121         | -            | 123                      | 114        | -          |
|                                  | (25 <sup>th</sup> , 75 <sup>th</sup> ) | (105, 137)               | (107, 135)  | -            | (113, 137)               | (100, 130) | -          |
|                                  | n                                      | 128                      | 130         | -            | 134                      | 123        | -          |
| B sire<br>(crosses 2, 7)         | Median (h)                             | 124                      | 137         | -            | 137                      | 120        | -          |
|                                  | (25 <sup>th</sup> , 75 <sup>th</sup> ) | (112, 143)               | (113, 152)  | -            | (114, 152)               | (106, 137) | -          |
|                                  | n                                      | 98                       | 98          | -            | 97                       | 98         | -          |
| S dam<br>(crosses 9, 10)         | Median (h)                             | -                        | 136         | 142          | -                        | 143        | 136        |
|                                  | (25 <sup>th</sup> , 75 <sup>th</sup> ) | -                        | (101, 162)  | (115, 196)   | -                        | (113, 196) | (105, 162) |
|                                  | n                                      | -                        | 110         | 106          | -                        | 115        | 98         |
| S sire<br>(crosses 3, 8)         | Median (h)                             | -                        | 112         | 127          | -                        | 120        | 119        |
|                                  | (25 <sup>th</sup> , 75 <sup>th</sup> ) | -                        | (90, 137)   | (105.5, 149) | -                        | (102, 137) | (100, 144) |
|                                  | n                                      | -                        | 131         | 132          | -                        | 131        | 124        |

Crosses (**B** = C57BL/6J mice; **S** = 129X/SvJ mice; **H** = BS or SB):

2 = BSxB; 3 = BSxS; 4 = BxB; 5 = BxB; 7 = SBxB; 8 = SBxS; 9 = SxB; 10 = SxB

**Supplemental Table 2. MSTs for combined *Shali1* (*D1Mit303*) and *Shali2* (*D4Mit308*) genotypes within backcross populations.**

| Backcross population             |                                        | 2-QTL Genotype ( <i>D1Mit303</i> – <i>D4Mit308</i> ) |              |              |                |               |            |                |
|----------------------------------|----------------------------------------|------------------------------------------------------|--------------|--------------|----------------|---------------|------------|----------------|
|                                  |                                        | BB-BB*                                               | BB-H         | H-BB         | H-H            | H-SS          | SS-H       | SS-SS          |
| Total                            | Median (h)                             | 126                                                  | 113          | 129          | 123            | 113           | 137        | 134.5          |
|                                  | (25 <sup>th</sup> , 75 <sup>th</sup> ) | (113, 138)                                           | (102, 129)   | (113, 146)   | (105.5, 138)   | (93.5, 145.8) | (112, 176) | (111.8, 154)   |
|                                  | n                                      | 115                                                  | 109          | 115          | 235            | 114           | 122        | 108            |
| Females                          | Median (h)                             | 126                                                  | 113          | 127          | 114            | 112           | 135        | 137            |
|                                  | (25 <sup>th</sup> , 75 <sup>th</sup> ) | (113, 138)                                           | (90, 125.5)  | (112, 145.5) | (102.5, 137)   | (89, 138)     | (112, 162) | (110.5, 151.5) |
|                                  | n                                      | 53                                                   | 51           | 51           | 115            | 59            | 53         | 52             |
| Males                            | Median (h)                             | 127.5                                                | 113          | 130          | 124.5          | 123           | 137        | 128            |
|                                  | (25 <sup>th</sup> , 75 <sup>th</sup> ) | (114, 138)                                           | (104.3, 136) | (114, 147.8) | (111, 146)     | (95.5, 149)   | (103, 184) | (111.8, 156.3) |
|                                  | n                                      | 62                                                   | 58           | 64           | 120            | 55            | 69         | 56             |
| Group B<br>(crosses 2, 4, 5, 7)  | Median (h)                             | 126                                                  | 113          | 129          | 121            | -             | -          | -              |
|                                  | (25 <sup>th</sup> , 75 <sup>th</sup> ) | (113, 138)                                           | (102, 129)   | (113, 146)   | (107, 137)     | -             | -          | -              |
|                                  | n                                      | 115                                                  | 109          | 115          | 111            | -             | -          | -              |
| Group S<br>(crosses 3, 8, 9, 10) | Median (h)                             | -                                                    | -            | -            | 123            | 113           | 137        | 134.5          |
|                                  | (25 <sup>th</sup> , 75 <sup>th</sup> ) | -                                                    | -            | -            | (101.8, 152.3) | (93.5, 145.8) | (112, 176) | (111.8, 154)   |
|                                  | n                                      | -                                                    | -            | -            | 124            | 114           | 122        | 108            |

\* **B**=C57BL/6J allele; **S**=129X/SvJ allele; **H**=BS or SB alleles
